# Supplementary material for: Current challenges and future needs of clinical and endoscopic training in gastroenterology: a European survey
Source: PubMed Central journal article supplement — Endosc Int Open. 2020 Mar 23;8(4):E525–33. doi: 10.1055/a-1093-0877 (PMC7089798; doi:10.1055/a-1093-0877), 2020-03-23

# Survey of gastroenterology training in Europe

Dear Trainee,

This questionnaire is part of an international survey of gastroenterology training in Europe, to highlight similarities and differences among different European training Centres. Therefore, the questionnaire has been submitted to you and to many other colleagues throughout Europe, to check different aspects of gastroenterology training, as you will notice.

Please answer to all questions, and please leave your comments, if any, at the end of the questionnaire.

We are sincerely thankful for your precious collaboration, which will help us to fulfill our project Thank you so much, and best wishes

Gianluca Ianiro  
Marcello Maida  
Laith Alrubayi  
Tomislav Bokun  
Johan Burisch  
Valeria Castro  
Louise China  
Guillaume Conroy  
Daniel Trabulo  
Christophe Van Steenkist  
Rogier Voermans

**\*Campo obbligatorio**

1. **Continuing with this interview you provide your informed consent to the confidential storage and the use of provided data for research purposes.**

**\* *Contrassegna solo un ovale.***

- I agree  
 I do not agree

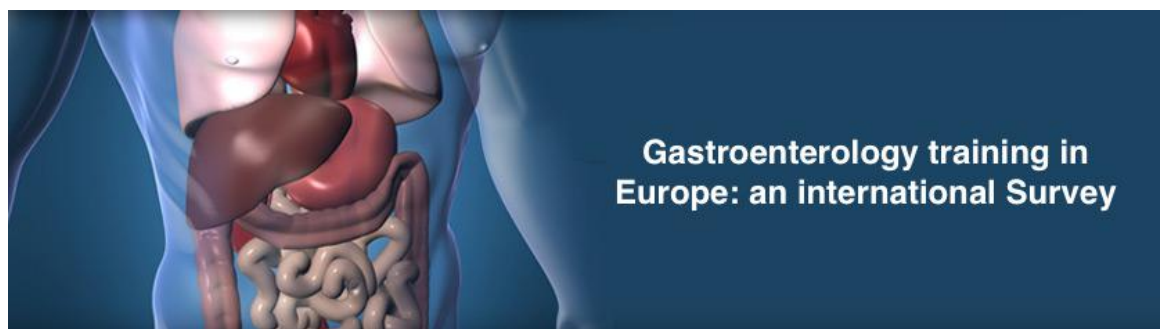

## Section 1 (General section)

---

2. **Please enter your initials**

**\* (Name and Surname)**

---

**3. What is your country of training?**

*\* Contrassegna solo un ovale.*

- Belgium
- Croatia
- Denmark
- France
- Germany
- Greece
- Italy
- Latvia
- Lithuania
- Netherlands
- Poland
- Portugal
- Romania
- Russia
- Serbia
- Sweden
- Switzerland
- United Kingdom
- Ukraine

**4. What is your city of training? \***

---

**5. Which year of your specialization training do you attend?**

*\* Contrassegna solo un ovale.*

- The last year
- A year different from the last
- I already finished my training

**6. What is the length (in years) of undergraduate medical school training in your country? \***

*Contrassegna solo un ovale.*

- 2
- 3
- 4
- 5
- 6

7. **What is the average length (in years) of postgraduate training in gastroenterology in your Country? \***

*Contrassegna solo un ovale.*

2

3

4

5

6

8. **Does your postgraduate training involve a core period of internal medicine prior to onset of gastroenterology training or during it? \***

*Contrassegna solo un ovale.*

Yes

No

9. **If yes, what is the length (in years)?**

*Contrassegna solo un ovale.*

1

2

3

4

10. **How do you enter the postgraduate training programme in your Country? \***

Please select one option between the two modalities of application (national application or local application) and one option among the three types of exam (oral exam, oral interview or both)

*Seleziona tutte le voci applicabili.*

Local application

National application

Written exam

Oral interview

Both of them

11. **Is there a national Programme, administrative order, guideline or regulatory body to regulate the postgraduate training in gastroenterology in your country? \***

*Contrassegna solo un ovale.*

Yes

No

12. **If yes, what core components does it include? Please tick them: *Seleziona tutte le voci applicabili.***

- General Gastroenterology
- Hepatology
- IBD
- Neurogastroenterology & motility
- Endoscopy
- Imaging
- Generic skills (communication etc.)

13. **Do you have a final exam prior to completing postgraduate training?**

*\* Contrassegna solo un ovale.*

- Yes
- No

14. **If yes, which type of exam?**

*Contrassegna solo un ovale.*

- Oral
- Written
- Both of them

15. **Do you have to carry out a final thesis to complete your postgraduate training?**

*\* Contrassegna solo un ovale.*

- Yes
- No

16. **Do you have a minimal number of practical procedures (endoscopy, ultrasound, etc.) required to complete your postgraduate training?**

*Contrassegna solo un ovale.*

- Yes
- No

17. **Do you record and verify your theoretical and practical activities?**

*\* Contrassegna solo un ovale.*

- Yes
- No

18. **If yes, how?**

*Contrassegna solo un ovale.*

- Logbook
- Electronic portfolio
- Altro: \_\_\_\_\_

19. **If yes, is it the same in the whole country? *Contrassegna solo un ovale.***

- Yes  
 No

20. **How many University training Centres in Gastroenterology are available in your Country of training? \***

---

21. **Are non-university centres involved in the educational programmes? \* *Contrassegna solo un ovale.***

- Yes  
 No

22. **Do you have the chance of a training period abroad or in another Centre? \* *Contrassegna solo un ovale.***

- Yes  
 No

23. **If yes, how many months at most? *Contrassegna solo un ovale.***

- 1-3  
 3-12  
 12-24  
 > 24

24. **Is it more usual for trainees to complete a PhD before or after the postgraduate gastroenterology training in your country of training? \* *Contrassegna solo un ovale.***

- Before  
 After

25. **Is it possible to undertake a PhD part time whilst in clinical training? \* *Contrassegna solo un ovale.***

- Yes  
 No, it is mandatory interrupt the training to attend a PhD

*Passa alla domanda 26.*

## Section 2 (Practical training activities)

### General

---

26. How many months of your training period are dedicated to endoscopic training? \*

---

27. How many months of your training period are dedicated to ultrasound training? \*

---

28. How many working hours per week are officially forecast by your training programme? \*

---

29. Instead, how many hours per week do you actually dedicate to clinical work? \*

---

30. Are night shifts/duties/availabilities included in your educational programme?

\* *Contrassegna solo un ovale.*

Yes

No

31. If yes, how many hours in a month, respectively? \*

---

32. Do you complete your training under the supervision of a named mentor/supervisor? \*

*Contrassegna solo un ovale.*

Yes

No

33. If yes, for which of these training activities?

*Seleziona tutte le voci applicabili.*

Ward clinical activities

Outpatient clinic activities

Endoscopic training

Ultrasound training

## Endoscopy training

---

34. What is the average number of total Upper GI endoscopy that you performed during your training period? \*

---

35. What is the average number of total Colonoscopy that you performed during your training period? \*

---

36. What is the average number of total Enteroscopy that you performed during your training period? \*

---

37. What is the average number of total ERCP that you performed during your training period? \*

---

38. What is the average number of total EUS that you performed during your training period? \*

---

39. Of those, how many interventional procedures did you perform during your training? \*  
*Contrassegna solo un ovale per riga.*

|                                                      | None                  | <10                   | 10-30                 | 30-50                 | 50-100                | 100-200               | >200                  |
|------------------------------------------------------|-----------------------|-----------------------|-----------------------|-----------------------|-----------------------|-----------------------|-----------------------|
| Haemostatic procedures for non-variceal bleeding     | <input type="radio"/> |
| Haemostatic procedures for variceal bleeding         | <input type="radio"/> |
| Polypectomy (lower GI/upper GI)                      | <input type="radio"/> |
| Endoscopic Mucosal Resection (lower GI/upper GI)     | <input type="radio"/> |
| Endoscopic Submucosal Dissection (lower GI/upper GI) | <input type="radio"/> |
| Balloon dilation (upper and lower tract)             | <input type="radio"/> |
| Percutaneous Endoscopic Gastrostomy (PEG)            | <input type="radio"/> |
| ERCP                                                 | <input type="radio"/> |
| EUS                                                  | <input type="radio"/> |
| Other                                                | <input type="radio"/> |

40. **How many emergency procedures (i.e. haemostatic procedures for variceal and non-variceal bleeding, foreign body endoscopic removal...) do you perform per month (on average)?**

---

41. **How many days (including nights) in a month are you on call for endoscopy (on average)? \***

*Contrassegna solo un ovale.*

- None
- <3
- 3-7
- >7

42. **On average, do trainees have access to training in pancreatobiliary endoscopy in hospitals that you have been trained in? \***

*Contrassegna solo un ovale.*

- Yes
- No

## Ultrasound (US) training

---

43. **What is the average number of total US diagnostic exams performed during your training programme? \***

---

44. **Of those, how many interventional procedures do you perform overall?**

*\* Contrassegna solo un ovale per riga.*

|                                            | None                  | <10                   | 10-30                 | 30-50                 | 50-100                | 100-200               | >200                  |
|--------------------------------------------|-----------------------|-----------------------|-----------------------|-----------------------|-----------------------|-----------------------|-----------------------|
| Liver biopsies?                            | <input type="radio"/> |
| Percutaneous ethanol injection procedures? | <input type="radio"/> |
| Radiofrequency ablation procedures?        | <input type="radio"/> |

## Other trainings

---

45. **How many oesophageal manometries do you estimate that you have performed or interpreted during your training? \***

---



46. **How many of these procedure have you performed or interpreted during your training? \***

*Contrassegna solo un ovale per riga.*

|                         | None                  | <10                   | 10-30                 | 30-50                 | 50-100                | 100-200               | >200                  |
|-------------------------|-----------------------|-----------------------|-----------------------|-----------------------|-----------------------|-----------------------|-----------------------|
| Oesophageal manometries | <input type="radio"/> |
| Anal manometries        | <input type="radio"/> |
| pH-metries              | <input type="radio"/> |
| Breath tests            | <input type="radio"/> |

47. **Do you receive training in proctology?**

*\* Contrassegna solo un ovale.*

Yes

No

48. **Are knowledge requirements in proctology training listed in your National Training Programme? \***

*Contrassegna solo un ovale.*

Yes

No

49. **Do you receive training in the interpretation of Gastrointestinal radiology imaging? \*** *Contrassegna solo un ovale.*

Yes

No

50. **Are knowledge requirements in radiology training listed in your National Training Programme? \***

*Contrassegna solo un ovale.*

Yes

No

### Section 3 (Theoretical training activities and research programs)

51. **How many lessons do you attend in a year, within your training?**

*\* Contrassegna solo un ovale.*

None

<10

10-30

30-50

>50

52. If yes, for a total amount of how many hours? *Contrassegna solo un ovale.*

- <10
- 10-30
- 30-50
- 50-100
- >100

53. How many national congresses do you attend in a year, on average? \*

Please insert a number

---

54. How many international congresses do you attend in a year, on average? \*

Please insert a number

---

55. Does your participation to a congress depend on the acceptance of an oral/poster presentation of your own research? \*  
*Contrassegna solo un ovale.*

- Yes
- No

56. Do you have reimbursement for congress-related expenses?  
\* *Contrassegna solo un ovale.*

- Yes
- No

57. How much time do you dedicate to scientific research in a month (in hours)?  
\* *Contrassegna solo un ovale.*

- None
- <5
- 5-10
- 10-30
- >30

58. Do you carry out your research within your free time or do you have set hours to spend on research during your worktime? \*  
*Contrassegna solo un ovale.*

- During free time
- During worktime

59. In your training centre do trainees have the chance to take some time out for scientific research? \*

*Contrassegna solo un ovale.*

Yes

No

60. If yes, how many months at most (in hours)? *Contrassegna solo un ovale.*

<5

5-10

10-30

>30

61. Which role do trainees generally fulfill within a research group, in your Training Centre? \*

*Seleziona tutte le voci applicabili.*

Data collection

Statistical analysis

Study concept and design

Manuscript writing

None

Other

62. How many scientific publications (abstracts) in international journals did you publish during the whole training period? \*

Please insert a number

---

63. How many scientific publications (full papers) in international journals did you publish during the whole training period? \*

Please insert a number

---

64. In your Country is there a minimum number of papers to be published to achieve the Gastroenterology certification? \*

*Contrassegna solo un ovale.*

Yes

No

## Section 4 (Financial and employment issues)

65. Which is the average salary per month of a last-year trainee in your country of training (in Euros)? \*

---

66. Does the salary per month increase over years in your country of training?

\* *Contrassegna solo un ovale.*

Yes

No

67. If yes, which is the average salary you receive during different years (in Euros)? Please make an average of different years of training

---

68. Do you receive a fee for night shifts/duties/availabilities?

\* *Contrassegna solo un ovale.*

Yes

No

69. If yes, how much is it (in Euros)?

---

70. (For females): does your training school allow you maternity leave?

\* *Contrassegna solo un ovale.*

Yes

No

71. How many months at most?

---

72. Is it paid or unpaid?

*Contrassegna solo un ovale.*

Paid

Unpaid

73. What percentage of trainees around you/in your professional entourage are employed in the first year after they have completed the training? \*

Please insert a number without symbols

---

## Section 5 (Critical issues and pitfalls of educational

## program)

### 74. How confident do you feel in managing the following disorders?

\* *Contrassegna solo un ovale per riga.*

|                                                | Not confident         | Little confident      | Quite confident       | Very confident        | Fully confident       |
|------------------------------------------------|-----------------------|-----------------------|-----------------------|-----------------------|-----------------------|
| Functional disorders of the GI tract           | <input type="radio"/> |
| Oro-oesophageal disorders                      | <input type="radio"/> |
| Stomach and duodenum                           | <input type="radio"/> |
| Pancreatic disorders                           | <input type="radio"/> |
| Biliary tract disorders                        | <input type="radio"/> |
| Liver                                          | <input type="radio"/> |
| Small intestine                                | <input type="radio"/> |
| Large intestine                                | <input type="radio"/> |
| Inflammatory bowel disease                     | <input type="radio"/> |
| Radiation and chemotherapy induced enteropathy | <input type="radio"/> |
| Ano-rectal disease                             | <input type="radio"/> |
| Nutrition                                      | <input type="radio"/> |

### 75. How confident do you feel in performing the following activities?

\* *Contrassegna solo un ovale per riga.*

| Not confident                |                       | Little confident      | Quite confident       | Very confident        | Fully confident       |
|------------------------------|-----------------------|-----------------------|-----------------------|-----------------------|-----------------------|
| Ward clinical activities     | <input type="radio"/> |
| Outpatient clinic activities | <input type="radio"/> |
| Ultrasound activities        | <input type="radio"/> |
| Endoscopic activities        | <input type="radio"/> |
| EUS                          | <input type="radio"/> |
| ERCP                         | <input type="radio"/> |
| Other diagnostic techniques  | <input type="radio"/> |
| Research activities          | <input type="radio"/> |

### 76. In your opinion, which educational areas should be improved in your Country \*

---



---



---



---



---



77. Do you think it is important to standardize the educational programs of Gastroenterology trainees in Europe? \*

*Contrassegna solo un ovale.*

Yes

No

78. If yes, how much?

*Contrassegna solo un ovale.*

1 2 3 4 5 6 7 8 9 10

---

---

79. Which aspects of the educational programs of training in gastroenterology would improve and standardize throughout Europe, at first? \*

---

---

---

---

---

80. Please leave your additional comments, if any

---

---

---

---

---

Powered by

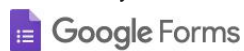

Supplement: 1653supmat-10-1055-a-1093-0877.pdf [file 1653supmat-10-1055-a-1093-0877.pdf]
